# Supplementary material for: Synergistic effect of water-soluble species and relative humidity on morphological changes in aerosol particles in the Beijing megacity during severe pollution episodes
Source: Copernicus journal article supplement (doi:10.5194/acp-19-219-2019), 2019-01-07
Supplement: Supplementary file 1 [file acp-19-219-2019-supplement.pdf]

Supplement of Atmos. Chem. Phys., 19, 219–232, 2019  
<https://doi.org/10.5194/acp-19-219-2019-supplement>  
© Author(s) 2019. This work is distributed under  
the Creative Commons Attribution 4.0 License.

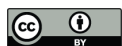

*Supplement of*

## **Synergistic effect of water-soluble species and relative humidity on morphological changes in aerosol particles in the Beijing megacity during severe pollution episodes**

**Xiaole Pan et al.**

*Correspondence to:* Xiaole Pan (panxiaole@mail.iap.ac.cn)

The copyright of individual parts of the supplement might differ from the CC BY 4.0 License.

## Supplementary Figures

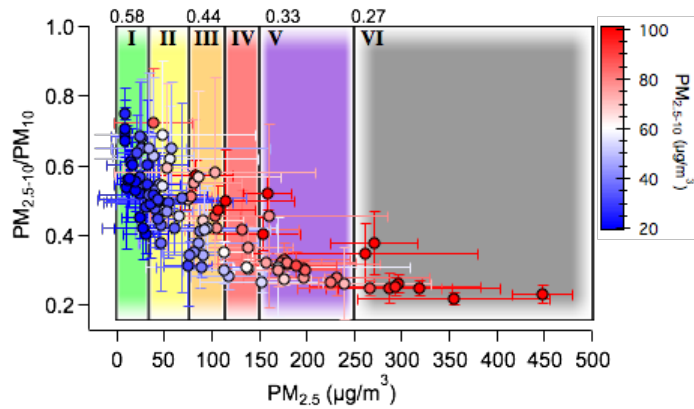

SF.1 The relationship between  $PM_{2.5-10}/PM_{10}$  as a function of mass concentration of  $PM_{2.5}$ . Colored-block behind the symbols indicate the air quality level classifications. Color filled circles indicated the daily averaged mass concentration of  $PM_{2.5}$ .

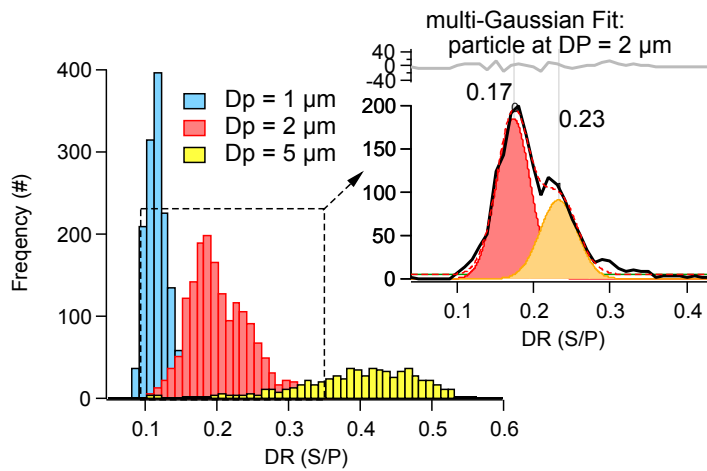

SF.2 Scatter plot of mass fraction of particle in coarse mode ( $PM_{2.5-10}$ ) in  $PM_{10}$  as a function of mass concentration of  $PM_{2.5}$ . The shaded colour represent the air quality level during observation period.
